# Supplementary material
Source: PubMed Central journal article supplement (PMC5628113)
Supplement: NIHMS877746-supplement-Supplemental_Content_A.pdf [file NIHMS877746-supplement-Supplemental_Content_A.pdf]

## Airway Bundle Checklist (FRONT and BACK)

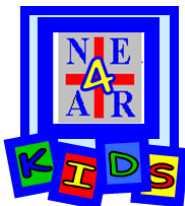

|                                                                                                                                                                                                                   |                                    |
|-------------------------------------------------------------------------------------------------------------------------------------------------------------------------------------------------------------------|------------------------------------|
| Date: _____                                                                                                                                                                                                       | [Place patient sticker/stamp here] |
| Time: _____                                                                                                                                                                                                       |                                    |
| <b>Front page completed</b> (check all that apply):                                                                                                                                                               |                                    |
| <input type="checkbox"/> On admission <input type="checkbox"/> During rounds <input type="checkbox"/> After Rounds <input type="checkbox"/> Just prior to intubation <input type="checkbox"/> Prior to Extubation |                                    |
| By _____                                                                                                                                                                                                          |                                    |

### Assessment for ANTICIPATED Airway Management

#### Intubation Risk Assessment

|                         |                                                                                                   |     |    |
|-------------------------|---------------------------------------------------------------------------------------------------|-----|----|
| <b>Difficult Airway</b> | History of difficult airway?                                                                      | YES | NO |
|                         | Physical? (e.g. small mouth, small jaw, large tongue, or short neck)                              | YES | NO |
| <b>At Risk For:</b>     | High risk for rapid <b>desaturation</b> during intubation                                         | YES | NO |
|                         | Increased ICP, pulmonary hypertension, need to avoid <b>hypercarbia</b>                           | YES | NO |
|                         | <b>Unstable hemodynamics</b> (e.g. hypovolemia, potential need for fluid bolus, vasopressor, CPR) | YES | NO |
|                         | Other risk factors? _____                                                                         | YES | NO |

#### Planning (all risk noted above should be considered in plan)

**Who** will intubate? (Specify primary provider who will perform **first** laryngoscopy):

Resident   
 Fellow   
 NP   
 Attending   
 Anesthesiologist   
 ENT physician   
 RT   
 Other - Specify below: \_\_\_\_\_

**Who** will bag-mask?   
 Resident   
 Fellow   
 NP   
 Attending   
 RT   
 Other (Specify) \_\_\_\_\_

|                                                                                                                                                                                                                                                                                                                                                                                       |                                                                                    |
|---------------------------------------------------------------------------------------------------------------------------------------------------------------------------------------------------------------------------------------------------------------------------------------------------------------------------------------------------------------------------------------|------------------------------------------------------------------------------------|
| <b>How</b> will we intubate? <b>Method:</b> <input type="checkbox"/> oral vs. <input type="checkbox"/> nasal                                                                                                                                                                                                                                                                          | <b>ETT Type:</b> <input type="checkbox"/> Cuffed <input type="checkbox"/> Uncuffed |
| <b>ETT Size:</b> <input type="checkbox"/> 3.0 <input type="checkbox"/> 3.5 <input type="checkbox"/> 4.0 <input type="checkbox"/> 4.5 <input type="checkbox"/> 5.0 <input type="checkbox"/> 5.5 <input type="checkbox"/> 6.0 <input type="checkbox"/> 6.5 <input type="checkbox"/> 7.0 <input type="checkbox"/> 7.5 <input type="checkbox"/> 8.0 <input type="checkbox"/> Other: _____ |                                                                                    |
| <b>Device:</b> <input type="checkbox"/> Laryngoscope <input type="checkbox"/> LMA _____ <input type="checkbox"/> Glidescope _____ <input type="checkbox"/> Other: _____                                                                                                                                                                                                               |                                                                                    |
| <b>Blade:</b> <input type="checkbox"/> Mac _____ <input type="checkbox"/> Miller _____ <input type="checkbox"/> Wis-Hipple _____                                                                                                                                                                                                                                                      |                                                                                    |
| <b>Meds:</b> <input type="checkbox"/> Atropine _____mg <input type="checkbox"/> Glycopyrrolate _____mcg                                                                                                                                                                                                                                                                               |                                                                                    |
| <input type="checkbox"/> Fentanyl _____mcg <input type="checkbox"/> Midazolam _____mg <input type="checkbox"/> Ketamine _____mg <input type="checkbox"/> Propofol _____mg                                                                                                                                                                                                             |                                                                                    |
| <input type="checkbox"/> Rocuronium _____mg <input type="checkbox"/> Vecuronium _____mg                                                                                                                                                                                                                                                                                               |                                                                                    |
| <b>Apenic Oxygenation:</b> YES / NO _____ L/min (<1y = 5L; 1-7y = 10L; ≥8y = 15L)                                                                                                                                                                                                                                                                                                     |                                                                                    |
| <b>Other:</b> _____                                                                                                                                                                                                                                                                                                                                                                   |                                                                                    |

**When** will we intubate? (describe the timing of airway management):

Prior to procedure at: \_\_\_\_\_   
 Mental Status Changes   
 Hypoxemia refractory to CPAP: SpO2 < \_\_\_\_\_%

Ventilation failure refractory to NIV   
 Loss of Airway Protection   
 Other: \_\_\_\_\_

|                                                                                                                                                                                                                                                                                                                                                                     |
|---------------------------------------------------------------------------------------------------------------------------------------------------------------------------------------------------------------------------------------------------------------------------------------------------------------------------------------------------------------------|
| <b>Backup?</b> Advanced Airway Provider: <input type="checkbox"/> Attending <input type="checkbox"/> Anesthesia <input type="checkbox"/> ENT <input type="checkbox"/> Fellow <input type="checkbox"/> Other: _____<br><input type="checkbox"/> Difficult Airway Cart <input type="checkbox"/> Difficult Airway Emergency Page <input type="checkbox"/> Other: _____ |
|---------------------------------------------------------------------------------------------------------------------------------------------------------------------------------------------------------------------------------------------------------------------------------------------------------------------------------------------------------------------|

Front page not filled out: Why? \_\_\_\_\_

## Immediate Pre-Intubation Procedure TIME OUT

Date: \_\_\_\_\_

Time: \_\_\_\_\_

**(Complete immediately before intubation)**

|                                                                                                                                                                                                                                                                       |
|-----------------------------------------------------------------------------------------------------------------------------------------------------------------------------------------------------------------------------------------------------------------------|
| <input type="checkbox"/> <b>Right Patient:</b> Confirm 2 identifiers and allergy status.<br>Did the patient eat or drink in the last 6 hours?                                                                                                                         |
| <input type="checkbox"/> <b>Right Plan:</b> Review and revise the FRONT PAGE plan                                                                                                                                                                                     |
| <input type="checkbox"/> <b>Right Prep:</b> Patient accessible and positioned correctly, bed cleared for intubation, working IV?                                                                                                                                      |
| <input type="checkbox"/> <b>Right Equipment:</b> SOAP (e.g Suction, Oxygen, Airway, Personnel), IV fluid bolus readily available?                                                                                                                                     |
| <input type="checkbox"/> <b>Right Monitoring:</b> BP cycling frequently, different extremity from pulse ox, pulse ox volume?                                                                                                                                          |
| <input type="checkbox"/> <b>Right Rescue plan:</b> Difficult Airway cart/kit and equipment available? Who can we call for assistance?<br><b>Double press ASCOM Alert Button, or call Emergency# 4CODE</b><br><b>State: "Stat Airway Emergency" (Provide Location)</b> |
| <input type="checkbox"/> <b>Right Attitude:</b> State out loud:<br><b>"IF anybody has a concern at any time during the procedure please SPEAK UP."</b>                                                                                                                |

Other PATIENT SPECIFIC preparation:

## Post-Procedure TIME OUT

All team members performed well without technical/communication challenges.

Or

Briefly describe below (comments by provider)

|              | What did we do well? | What can we improve upon? |
|--------------|----------------------|---------------------------|
| 1. RT        |                      |                           |
| 2. Nurse     |                      |                           |
| 3. Resident  |                      |                           |
| 4. NP/PA     |                      |                           |
| 5. Fellow    |                      |                           |
| 6. Attending |                      |                           |

ETT Cuff adjusted to minimal leak: YES / NO

Goal SBS \_\_\_\_\_ (- 3 to +2)

Was the patient difficult to ventilate? YES/NO

Was the Patient difficult to Intubate? YES/NO

*\*If Yes to either question please remember to put an ALERT in Epic and a SIGN at the bedside.\**

Back page completed by (PRINT): \_\_\_\_\_

Intubated by: \_\_\_\_\_

NEAR4Kids data form completed after intubation?
