# Supplementary material
Source: PubMed Central journal article supplement (PMC5628113)
Supplement: NIHMS877746-supplement-Supplemental_Content_B.pdf [file NIHMS877746-supplement-Supplemental_Content_B.pdf]

## **QI Focus Group Questions**

1. What are some concerns you have about intubations in your unit?
2. What are some risks to your patients during intubations in your unit?
3. What patient safety measures for airway management existed before the intubation safety bundle started in your unit?
4. What is your understanding of the purpose of the intubation safety bundle?
5. What is your responsibility as (RN, NP, MD, RT) in implementing the intubation safety bundle?
6. What is the major challenge in implementing the intubation safety bundle in your unit?
7. What is the main person or process that helped with implementing the intubation safety bundle in your unit?
8. Do you have any ideas to improve intubation safety in your ICU?
9. Is there anything else you would like to tell us about the intubation safety bundle?
